# Supplementary material for: ePGA: A Web-Based Information System for Translational Pharmacogenomics
Source: PubMed Central journal article supplement (PMC5025168; doi:10.1371/journal.pone.0162801), 2016-09-15
Supplement: pone.0162801.s001.pdf [file pone.0162801.s001.pdf]

# ePGA report

This is the eMoDiA report for the phase 3 sample HG0096 of 1000 Genomes Project

---

## ePGA: Purpose and Use

ePGA TRANSLATION SERVICE IS SOLELY FOR RESEARCH, DEMONSTRATIONAL & EDUCATIONAL PURPOSES

ePGA Translation Service is meant to DEMONSTRATE the **potential** of translating validated PGx knowledge into clinical practice

In its current implementation ePGA Translation Service use just public-domain and completely anonymous genotype profiles from the 1000 Genomes project (Phase I/1092 sample cases, Phase III / 2504 sample cases) in order to **demonstrate** its functionality

- The ePGA Translation Service adheres to the emerging trend of pre-emptive high-throughput genotyping as a vital clinical (diagnostic and prognostic) decision making component aiming to offer respective genotype-to-phenotype inference services as a mean to translate PGx knowledge from bench-to-bedside.
  - The ePGA Translation Service is based on ‘matching’ individual genotype (SNP) profiles with PGx gene haplotypes, and the subsequent inference of the corresponding metabolizer phenotypes. Currently ePGA/Translation component employs harmonized haplotypes-tables as registered and curated by [PharmGKB](#) (the most advanced PGx knowledge base). The developers of ePGA are planning to expand the system in order to capture and cover PGx knowledge from other sources as well.
  - ePGA developers reserve the right at any time, to make changes to the whole or any part of the services offered on this Web-site as it deems appropriate.
- 

| sample  | gene    | diplootype                                              | phenotype |
|---------|---------|---------------------------------------------------------|-----------|
| HG00096 | ABCC2   | H15/H5                                                  | Var/Var   |
| HG00096 | ADRB1   | H1/H1                                                   | WT/WT     |
| HG00096 | ADRB2   | 4.0/4.0                                                 | Var/Var   |
| HG00096 | APOE    | E3/E3                                                   | WT/WT     |
| HG00096 | CDA     | 1A/1A                                                   | WT/WT     |
| HG00096 | CFTR    | Reference/Reference                                     | WT/WT     |
| HG00096 | CHRNA5  | haplotype 1/haplotype 3                                 | WT/Var    |
| HG00096 | COMT    | Haplotype high activity/Haplotype intermediate activity | WT/Var    |
| HG00096 | CYP1A1  | 1/1                                                     | WT/WT     |
| HG00096 | CYP1A2  | 1M/1M                                                   | Var/Var   |
| HG00096 | CYP1B1  | 1/4                                                     | WT/Var    |
| HG00096 | CYP2A13 | 1/1                                                     | WT/WT     |
| HG00096 | CYP2A6  | 1A/1A                                                   | WT/WT     |
| HG00096 | CYP2C8  | 1A/4                                                    | WT/Var    |
| HG00096 | CYP2C9  | 1/1                                                     | WT/WT     |
| HG00096 | CYP2E1  | 1/1                                                     | WT/WT     |
| HG00096 | CYP2R1  | 1/1                                                     | WT/WT     |

| sample  | gene     | diplotype                 | phenotype |
|---------|----------|---------------------------|-----------|
| HG00096 | CYP2S1   | 1A/1A                     | WT/WT     |
| HG00096 | CYP2W1   | 1A/1A                     | WT/WT     |
| HG00096 | CYP3A43  | 1/1                       | WT/WT     |
| HG00096 | CYP3A7   | 2/2                       | Var/Var   |
| HG00096 | CYP4B1   | 1/2A                      | WT/Var    |
| HG00096 | CYP4F2   | 1/1                       | WT/WT     |
| HG00096 | DDC      | #1/#3                     | WT/Var    |
| HG00096 | DPYD     | 1/9A                      | WT/Var    |
| HG00096 | DPYD_2   | rs67376798T/rs67376798T   | WT/WT     |
| HG00096 | G6PD     | B (wildtype)/B (wildtype) | WT/WT     |
| HG00096 | HMGCR    | H2/H2                     | WT/WT     |
| HG00096 | HTR2C    | 1-2-1/2-1-1               | WT/Var    |
| HG00096 | IGFBP3   | 7/10                      | Var/Var   |
| HG00096 | LDLR     | L1/L1                     | Var/Var   |
| HG00096 | NAT1     | 4/10                      | WT/Var    |
| HG00096 | P2RY12_2 | H1/H2                     | WT/Var    |
| HG00096 | PIK3CA   | H1/H3                     | WT/Var    |
| HG00096 | SCN1A    | #1/#2                     | WT/Var    |
| HG00096 | SCN5A    | Haplotype A/Haplotype A   | WT/WT     |
| HG00096 | SCNN1B   | 1_1/1_2                   | WT/Var    |
| HG00096 | SLC22A1  | 1/1                       | WT/WT     |
| HG00096 | SLC25A27 | CCAC/CTAT                 | WT/Var    |
| HG00096 | SULT1A2  | 1/1                       | WT/WT     |
| HG00096 | SULT1C2  | 1/2                       | WT/Var    |
| HG00096 | SULT2A1  | 1/1                       | WT/WT     |
| HG00096 | SULT4A1  | #2/#6                     | Var/Var   |
| HG00096 | TPMT     | 1/1                       | WT/WT     |
| HG00096 | UGT1A10  | 1a/1a                     | WT/WT     |
| HG00096 | UGT1A3   | 1/6                       | WT/Var    |
| HG00096 | UGT1A3_2 | 1a/6a                     | WT/Var    |
| HG00096 | UGT1A4   | 1a/1b                     | WT/Var    |
| HG00096 | UGT1A5   | 1/1                       | WT/WT     |
| HG00096 | UGT1A8   | 1a/1a                     | WT/WT     |
| HG00096 | UGT1A9   | 1a/1q                     | WT/Var    |
| HG00096 | UGT2B15  | 4/5                       | Var/Var   |
