# Supplementary material for: ePGA: A Web-Based Information System for Translational Pharmacogenomics
Source: PubMed Central journal article supplement (PMC5025168; doi:10.1371/journal.pone.0162801), 2016-09-15
Supplement: pone.0162801.s002.pdf [file pone.0162801.s002.pdf]

| <b>Gene</b> | <b>Chromosome</b> | <b>Full Name</b>                                         | <b>Class (from PharmADME.org)</b> | <b>FDA biomarker</b> | <b>PGx variants</b> | <b>PGx haplotypes</b> | <b>Drugs</b> |
|-------------|-------------------|----------------------------------------------------------|-----------------------------------|----------------------|---------------------|-----------------------|--------------|
| ABCB1       | 7                 | ATP-binding cassette, sub-family B (MDR/TAP), member 1   | Transporter                       |                      | 6                   | 4                     | 82           |
| ABCC10      | 6                 | ATP-binding cassette, sub-family C (CFTR/MRP), member 10 | Transporter                       |                      | 3                   | 1                     | 1            |
| ABCC2       | 10                | ATP-binding cassette, sub-family C (CFTR/MRP), member 2  | Transporter                       |                      | 6                   | 14                    | 20           |
| ADRB1       | 10                | adrenoceptor beta 1                                      |                                   |                      | 2                   | 3                     | 11           |
| ADRB2       | 5                 | adrenoceptor beta 2, surface                             |                                   |                      | 2                   | 4                     | 10           |
| APOE        | 19                | apolipoprotein E                                         |                                   |                      | 2                   | 3                     | 9            |
| BRCA1       | 17                | breast cancer 1, early onset                             |                                   |                      | 9                   | 6                     | 0            |
| CDA         | 1                 | cytidine deaminase                                       | Modifier                          |                      | 5                   | 12                    | 3            |
| CFTR        | 7                 | cystic fibrosis transmembrane conductance regulator      | Modifier                          | Yes                  | 12                  | 13                    | 1            |
| CHRNA5      | 15                | cholinergic receptor, nicotinic, alpha 5 (neuronal)      |                                   |                      | 2                   | 3                     | 2            |
| COMT        | 22                | catechol-O-methyltransferase                             |                                   |                      | 4                   | 3                     | 11           |
| CYP1A1      | 15                | cytochrome P450, family 1, subfamily A, polypeptide 1    | Phase I                           |                      | 10                  | 13                    | 3            |
| CYP1A2      | 15                | cytochrome P450, family 1, subfamily A, polypeptide 2    | Phase I                           |                      | 25                  | 29                    | 13           |
| CYP1B1      | 2                 | cytochrome P450, family 1, subfamily B, polypeptide 1    | Phase I                           |                      | 18                  | 20                    | 0            |
| CYP2A13     | 19                | cytochrome P450, family 2, subfamily A, polypeptide 13   | Phase I                           |                      | 8                   | 6                     | 0            |

|         |    |                                                        |         |     |    |    |    |
|---------|----|--------------------------------------------------------|---------|-----|----|----|----|
| CYP2A6  | 19 | cytochrome P450, family 2, subfamily A, polypeptide 6  | Phase I |     | 27 | 11 | 4  |
| CYP2B6  | 19 | cytochrome P450, family 2, subfamily B, polypeptide 6  | Phase I | Yes | 41 | 40 | 10 |
| CYP2C19 | 10 | cytochrome P450, family 2, subfamily C, polypeptide 19 | Phase I | Yes | 51 | 37 | 33 |
| CYP2C8  | 10 | cytochrome P450, family 2, subfamily C, polypeptide 8  | Phase I |     | 4  | 2  | 9  |
| CYP2C9  | 10 | cytochrome P450, family 2, subfamily C, polypeptide 9  | Phase I | Yes | 26 | 27 | 23 |
| CYP2D6  | 22 | cytochrome P450, family 2, subfamily D, polypeptide 6  | Phase I | Yes | 52 | 27 | 55 |
| CYP2E1  | 10 | cytochrome P450, family 2, subfamily E, polypeptide 1  | Phase I |     | 6  | 6  | 6  |
| CYP2F1  | 19 | cytochrome P450, family 2, subfamily F, polypeptide 1  | Phase I |     | 7  | 6  | 0  |
| CYP2R1  | 11 | cytochrome P450, family 2, subfamily R, polypeptide 1  | Phase I |     | 1  | 2  | 0  |
| CYP2S1  | 19 | cytochrome P450, family 2, subfamily S, polypeptide 1  | Phase I |     | 2  | 1  | 0  |
| CYP2W1  | 7  | glucose-6-phosphate dehydrogenase                      |         |     | 3  | 3  | 0  |
| CYP3A4  | 7  | cytochrome P450, family 3, subfamily A, polypeptide 4  | Phase I |     | 26 | 30 | 15 |
| CYP3A43 | 7  | cytochrome P450, family 3, subfamily A, polypeptide 43 | Phase I |     | 1  | 2  | 1  |
| CYP3A5  | 7  | cytochrome P450, family 3, subfamily A, polypeptide 5  | Phase I | Yes | 12 | 10 | 17 |
| CYP3A7  | 7  | cytochrome P450, family 3, subfamily A, polypeptide 7  | Phase I |     | 1  | 2  | 0  |
| CYP4A22 | 1  | cytochrome P450, family 4, subfamily A, polypeptide 22 |         |     | 9  | 10 | 0  |

|        |    |                                                                         |          |     |    |    |    |
|--------|----|-------------------------------------------------------------------------|----------|-----|----|----|----|
| CYP4B1 | 1  | cytochrome P450, family 4, subfamily B, polypeptide 1                   | Phase I  |     | 6  | 7  | 2  |
| CYP4F2 | 19 | cytochrome P450, family 4, subfamily F, polypeptide 2                   | Phase I  |     | 2  | 3  | 6  |
| DDC    | 7  | dopa decarboxylase (aromatic L-amino acid decarboxylase)                |          |     | 5  | 5  | 0  |
| DPYD   | 1  | dihydropyrimidine dehydrogenase                                         | Phase I  | Yes | 14 | 15 | 9  |
| G6PD   | X  | glucose-6-phosphate dehydrogenase                                       |          | Yes | 10 | 14 | 21 |
| HMGCR  | 5  | 3-hydroxy-3-methylglutaryl-Coenzyme A reductase                         |          |     | 11 | 2  | 6  |
| HTR2C  | X  | 5-hydroxytryptamine (serotonin) receptor 2C, G protein-coupled          |          |     | 3  | 3  | 5  |
| IGFBP3 | 7  | insulin-like growth factor binding protein 3                            |          |     | 4  | 11 | 0  |
| LDLR   | 19 | low density lipoprotein receptor                                        |          | Yes | 5  | 6  | 2  |
| NAT1   | 8  | N-acetyltransferase 1 (arylamine N-acetyltransferase)                   | Phase II | Yes | 24 | 23 | 0  |
| NAT2   | 8  | N-acetyltransferase 2 (arylamine N-acetyltransferase)                   | Phase II | Yes | 32 | 86 | 7  |
| P2RY12 | 3  | purinergic receptor P2Y, G-protein coupled, 12                          |          |     | 5  | 6  | 2  |
| PIK3CA | 3  | phosphatidylinositol-4,5-bisphosphate 3-kinase, catalytic subunit alpha |          |     | 5  | 5  | 1  |
| SCN1A  | 2  | sodium channel, voltage gated, type I alpha subunit                     |          |     | 2  | 4  | 2  |

|          |    |                                                                     |             |  |    |    |    |
|----------|----|---------------------------------------------------------------------|-------------|--|----|----|----|
| SCN5A    | 3  | sodium channel, voltage gated, type V alpha subunit                 |             |  | 1  | 1  | 0  |
| SCNN1B   | 16 | sodium channel, non voltage gated 1 beta subunit                    |             |  | 4  | 4  | 0  |
| SLC22A1  | 6  | solute carrier family 22 (organic cation transporter), member 1     | Transporter |  | 5  | 6  | 4  |
| SLC25A27 | 6  | solute carrier family 25, member 27                                 |             |  | 4  | 4  | 0  |
| SLCO1B1  | 12 | solute carrier organic anion transporter family, member 1B1         | Transporter |  | 28 | 36 | 23 |
| SULT1A1  | 16 | sulfotransferase family, cytosolic, 1A, phenol-preferring, member 1 | Phase II    |  | 3  | 4  | 1  |
| SULT1A2  | 16 | sulfotransferase family, cytosolic, 1A, phenol-preferring, member 2 | Phase II    |  | 3  | 3  | 1  |
| SULT1A3  | 16 | sulfotransferase family, cytosolic, 1A, phenol-preferring, member 3 | Phase II    |  | 3  | 5  | 0  |
| SULT1C2  | 2  | sulfotransferase family, cytosolic, 1C, member 2                    | Phase II    |  | 4  | 5  | 0  |
| SULT1E1  | 4  | sulfotransferase family 1E, estrogen-preferring, member 1           | Phase II    |  | 3  | 4  | 0  |
| SULT2A1  | 19 | sulfotransferase family, cytosolic, 2A, DHEA preferring, member 1   | Phase II    |  | 3  | 4  | 0  |
| SULT4A1  | 22 | sulfotransferase family 4A, member 1                                | Phase II    |  | 11 | 6  | 0  |

|         |   |                                                       |          |     |    |    |    |
|---------|---|-------------------------------------------------------|----------|-----|----|----|----|
| TPMT    | 6 | thiopurine S-methyltransferase,                       | Phase II | Yes | 31 | 31 | 7  |
| UGT1A1  | 2 | UDP glucuronosyltransferase 1 family, polypeptide A1  | Phase II | Yes | 17 | 21 | 11 |
| UGT1A10 | 2 | UDP glucuronosyltransferase 1 family, polypeptide A10 | Phase II |     | 7  | 10 | 1  |
| UGT1A3  | 2 | UDP glucuronosyltransferase 1 family, polypeptide A3  | Phase II |     | 17 | 19 | 1  |
| UGT1A4  | 2 | UDP glucuronosyltransferase 1 family, polypeptide A4  | Phase II |     | 9  | 7  | 5  |
| UGT1A5  | 2 | UDP glucuronosyltransferase 1 family, polypeptide A5  | Phase II |     | 4  | 3  | 0  |
| UGT1A6  | 2 | UDP glucuronosyltransferase 1 family, polypeptide A6  | Phase II |     | 12 | 11 | 5  |
| UGT1A7  | 2 | UDP glucuronosyltransferase 1 family, polypeptide A7  | Phase II |     | 8  | 9  | 4  |
| UGT1A8  | 2 | UDP glucuronosyltransferase 1 family, polypeptide A8  | Phase II |     | 3  | 4  | 6  |
| UGT1A9  | 2 | UDP glucuronosyltransferase 1 family, polypeptide A9  | Phase II |     | 10 | 11 | 8  |
| UGT2B15 | 4 | UDP glucuronosyltransferase 2 family, polypeptide B15 | Phase II |     | 4  | 7  | 2  |

|        |    |                                                |  |     |    |   |   |
|--------|----|------------------------------------------------|--|-----|----|---|---|
| VKORC1 | 16 | vitamin K epoxide reductase complex, subunit 1 |  | Yes | 10 | 9 | 4 |
|--------|----|------------------------------------------------|--|-----|----|---|---|

**S1 Table:** Pharmacogenomic information for 69 pharmacogenes for which ePGA’s translation service is offered. First column lists gene name, followed by chromosome and gene’s full name. Column four lists gene’s ADMET category (Phase I, II, Transformer or Modifier). Empty cells indicate unknown category. FDA biomarker column indicates Pharmacogenomic Biomarkers in drug labeling (see <http://www.fda.gov/Drugs/ScienceResearch/ResearchAreas/Pharmacogenetics/ucm083378.htm> for details). The following two columns labeled as PGx variants and haplotypes, provide information on the number of variants that are included in each gene’s haplotype table and the number of haplotypes, respectively. Last column shows the number of drugs that are related to each gene as provided by ePGA’s explore service.
